# Supplementary material for: Comparative effectiveness of bisphosphonate treatments for the prevention of re-fracture in glucocorticoid-induced osteoporosis: protocol for a systematic review and meta-analysis
Source: PubMed Central journal article supplement — BMJ Open. 2022 Sep 26;12(9):e062537. doi: 10.1136/bmjopen-2022-062537 (PMC9516213; doi:10.1136/bmjopen-2022-062537), 2022-09-26
Supplement: bmjopen-2022-062537.draft_revisions.pdf [file bmjopen-2022-062537.draft_revisions.pdf]

# BMJ Open

BMJ Open is committed to open peer review. As part of this commitment we make the peer review history of every article we publish publicly available.

When an article is published we post the peer reviewers' comments and the authors' responses online. We also post the versions of the paper that were used during peer review. These are the versions that the peer review comments apply to.

The versions of the paper that follow are the versions that were submitted during the peer review process. They are not the versions of record or the final published versions. They should not be cited or distributed as the published version of this manuscript.

BMJ Open is an open access journal and the full, final, typeset and author-corrected version of record of the manuscript is available on our site with no access controls, subscription charges or pay-per-view fees (<http://bmjopen.bmj.com>).

If you have any questions on BMJ Open's open peer review process please email [info.bmjopen@bmj.com](mailto:info.bmjopen@bmj.com)

# BMJ Open

## **Bisphosphonate in the effectiveness of Glucocorticoid-induced osteoporosis (GIOP) and for the prevention of re-fracture: a protocol for systematic review and meta-analysis**

|                               |                                                                                                                                                                                                                                                                                                                                                                                                                                                                                                                                  |
|-------------------------------|----------------------------------------------------------------------------------------------------------------------------------------------------------------------------------------------------------------------------------------------------------------------------------------------------------------------------------------------------------------------------------------------------------------------------------------------------------------------------------------------------------------------------------|
| Journal:                      | <i>BMJ Open</i>                                                                                                                                                                                                                                                                                                                                                                                                                                                                                                                  |
| Manuscript ID                 | bmjopen-2022-062537                                                                                                                                                                                                                                                                                                                                                                                                                                                                                                              |
| Article Type:                 | Protocol                                                                                                                                                                                                                                                                                                                                                                                                                                                                                                                         |
| Date Submitted by the Author: | 04-Mar-2022                                                                                                                                                                                                                                                                                                                                                                                                                                                                                                                      |
| Complete List of Authors:     | <p>Chu, Hongmin; Ongjin public healthcenter, Daechong Public Health Subcenter</p> <p>Jang, Bo-Hyoung; Kyung Hee University College of Korean Medicine, Department of Preventive Medicine</p> <p>Kim, GaYoon; Ewha Womans University, Department of Health Convergence</p> <p>Bae, Seowoo; National Cancer Center, National Cancer Control Institute</p> <p>Lee, Hyeju; Ewha Womans University,</p> <p>Nam, Seonghee; Ewha Womans University,</p> <p>Ahn, Jeonghoon; Ewha Womans University, Department of Health Convergence</p> |
| Keywords:                     | Bone diseases < ORTHOPAEDIC & TRAUMA SURGERY, CLINICAL PHYSIOLOGY, Protocols & guidelines < HEALTH SERVICES ADMINISTRATION & MANAGEMENT                                                                                                                                                                                                                                                                                                                                                                                          |
|                               |                                                                                                                                                                                                                                                                                                                                                                                                                                                                                                                                  |

SCHOLARONE™  
Manuscripts

1  
2  
3  
4  
5  
6  
7  
8  
9  
10  
11  
12  
13  
14  
15  
16  
17  
18  
19  
20  
21  
22  
23  
24  
25  
26  
27  
28  
29  
30  
31  
32  
33  
34  
35  
36  
37  
38  
39  
40  
41  
42  
43  
44  
45  
46  
47  
48  
49  
50  
51  
52  
53  
54  
55  
56  
57  
58  
59  
60

# Bisphosphonate in the effectiveness of Glucocorticoid-induced osteoporosis (GIOP) and for the prevention of re-fracture: a protocol for systematic review and meta-analysis

Hongmin Chu, **KMD, Ph.D**<sup>1,a</sup>, Bo-Hyoung Jang **KMD, MPH, Ph.D**<sup>2,a</sup>, GaYoon Kim<sup>3</sup>, Seowoo Bae, **M.A.**<sup>4</sup>, Hye Ju Lee, **B.A.**<sup>3</sup>, Seonghee Nam, **B.A.**<sup>3</sup>, Jeonghoon Ahn **Ph.D.**<sup>3\*</sup>

1. Daecheong Public Health Subcenter, Ongjin-gun, Incheon, Korea
  2. Department of Preventive Medicine, College of Korean Medicine, Kyung Hee University, Seoul, Republic of Korea
  3. Department of Health Convergence, Ewha Womans University, Seoul, Korea
  4. National Cancer Control Institute, National Cancer Center, Goyang, Korea
- a. Two authors are contributed equally.

\*Correspondence: Jeonghoon Ahn, Department of Health Convergence, Ewha Womans University, 52, Ewhayodae-gil, Seodaemun-gu, Seoul, Republic of Korea (e-mail: ahnjeonghoon@ewha.ac.kr).

# Bisphosphonate in the effectiveness of Glucocorticoid-induced osteoporosis (GIOP) and for the prevention of re-fracture: a protocol for systematic review and meta-analysis

## Abstract

Introduction: Long-term usage of Glucocorticoid results in a loss of bone mass and a higher risk of fracture and the most common cause of secondary osteoporosis is glucocorticoid-induced osteoporosis (GIOP). For preventing GIOP, Bisphosphonate (BP) is widely used. However, the analysis on the BP's effect of prevention of re-fracture is insufficient. The purpose of the present study is to evaluate the comparative treatment effect and prevention of re-fracture according to the type of bisphosphonate in GIOP as the basis for reliable clinical strategies for patients.

Methods and Analysis: Electronic databases searches of the PubMed, Cochrane Library, EMBASE will be performed. Randomized controlled trials (RCTs), quasi-RCTs, controlled trials, and cohort studies evaluating effectiveness of BP to the GIOP patients will be included in this study. The primary outcome will be the incidence of hip, vertebral, and other fractures. The secondary outcome will include percentage changes on the Bone Mineral Density. Assessing risk of bias for included studies is assessed using the Cochrane Risk of Bias tool and Risk Of Bias In Non-randomized Studies – of Intervention tool. If quantitative synthesis is possible, a meta-analysis will be performed. A subgroup analysis will be conducted to compare refracture rate on the GIOP patients who experience previous fracture history.

Ethics and dissemination: Formal ethical approval is not required, and findings will be published in a peer-reviewed journal

Protocol registry number of online registry: This study protocol was registered in open Science framework (OSF) (Registration DOI: [10.17605/OSF.IO/GF9WB](https://doi.org/10.17605/OSF.IO/GF9WB))

URL of the online registry: <https://osf.io/gf9wb>

Keywords: FRAX, BMD, GIOP, osteoporosis

## 1. Introduction

Glucocorticoid-induced osteoporosis (GIOP) is a serious side effect of glucocorticoids (GC), which are used for the treatment of inflammatory conditions.<sup>1,2</sup> It causes an increased risk of fracture and bone loss and has been reported to occur in as many as 30-50% of patients who receive chronic glucocorticoid therapy.<sup>3</sup> The duration and dose of GCs both increase the risk of fracture.<sup>1,4</sup> The incidence of fractures of patients who received long-term GC treatment was twice as high as that of those who received short-term GC treatment.<sup>5,6</sup> In addition, the higher the dosage, the more likely a fracture may occur.<sup>4</sup>

Bisphosphonate (BP) is widely used as a treatment for osteoporosis with mechanisms such as inhibition of bone resorption through osteoclast inhibition, inhibition of osteoclast formation, and increased production of osteoprotegerin.<sup>7</sup> In particular, there are injections and oral preparations for BP. Oral intake drugs such as alendronate, risedronate, and ibandronate are used widely. For injections, pamidronate, ibandronate, and zoledronate are used. In particular, injections only need to be administered once a month, or once at three months, so they have the advantage of high compliance in elderly patients who are taking multiple drugs, and their absorption rate is also high compared to oral drugs, so it is widely used.<sup>8</sup>

In the previous study, there is a study comparing the effects of BP on osteopenic postmenopausal women.<sup>7</sup> However, systematic reviews and meta-analysis according to the type of BP were not performed for GIOP patients. In addition, although Fracture Risk Assessment Tool (FRAX) is widely used internationally in diagnosing GIOP, it is also diagnosed based on Bone Mineral Densitometer (BMD).<sup>2</sup> So both indicators should be included and analyzed together. Moreover, in the case of past fractures among GIOP patients, the analysis on the BP's effect of prevention of re-fracture is insufficient. The purpose of the present study is to evaluate the comparative treatment effect and prevention of re-fracture

1  
2  
3  
4 according to the type of bisphosphonate in GIOP patients.  
5  
6  
7  
8  
9

## 10 **2. Methods**

### 11 12 13 2.1 Study registration

14  
15 The protocol of this study complied with the Preferred Reporting Items for Systematic  
16 Reviews and Meta-Analysis Protocol (PRISMA) guidelines.<sup>9</sup> This systematic review protocol  
17 was registered in open Science framework (OSF) (Registration DOI:  
18 10.17605/OSF.IO/GF9WB; URL: <https://osf.io/gf9wb>)  
19  
20  
21  
22  
23  
24  
25  
26  
27  
28

### 29 2.2 Eligible criteria for study selection

#### 30 31 32 2.2.1 Types of studies

33 Peer-reviewed and published experimental randomized controlled trials (RCTs), quasi-  
34 randomized controlled trials, controlled trials, observational study indicating will be included  
35 in the search. Other reference or studies of related GIOP and Fracture will be checked and  
36 hand-searched for prospective inclusion.  
37  
38  
39  
40  
41  
42

#### 43 44 45 2.2.2 Types of participants

46 Eligible participants will be GIOP patients diagnosed with a BMD score (less than or equal to  
47 2.5) or FRAX guidelines. There will be no restrictions based on sex, ethnicity, symptom  
48 severity, disease duration, and clinical setting. There are no limits based on gender, race, the  
49 severity of symptoms, the length of the condition, or the clinical environment.  
50  
51  
52  
53  
54

#### 55 56 57 2.2.3 Types of interventions and comparators

58 We will include treatment in which osteoporosis was diagnosed based on using FRAX or  
59  
60

1  
2  
3  
4 BMD. The comparison will be conducted between the Bisphosphonate treatments and other  
5 pharmacological interventions such as denosumab.<sup>10</sup> Placebo or non-treatments group control  
6  
7 will also be included.  
8  
9

#### 10 11 2.2.4 Types of outcome measures

12 The primary outcome will be the incidence of hip, vertebral, and other fractures. The  
13  
14 secondary outcome will include percentage changes on the Bone Mineral Density.  
15  
16  
17

### 18 19 20 21 2.3 Search strategies for the identification of studies

#### 22 23 2.3.1 Electronic searches

24 The following electronic databases will be searched from inception to 2021: PubMed,  
25  
26 EMBASE, the Cochrane Central Register of Controlled Trials (CENTRAL). The specific  
27  
28 search strategies (for example, PubMed) are listed in **Table 1**. For making precise searching  
29  
30 strategies, we look up several reviews of osteoporosis.<sup>11-13</sup>  
31  
32  
33  
34  
35  
36  
37  
38

39 Table 1. Search strategy for medline (via PubMed).  
40  
41

|                                |
|--------------------------------|
| 42 #1 steroid[MeSH terms]      |
| 43                             |
| 44 #2 steroid*[TIAB]           |
| 45                             |
| 46 #3 glucocorticoid*[TIAB]    |
| 47                             |
| 48 #4 #1 OR #2 OR #3           |
| 49                             |
| 50                             |
| 51 #5 osteoporosis[MeSH terms] |
| 52                             |
| 53 #6 osteoporos*[TIAB]        |
| 54                             |
| 55 #7 osteoporos*[TIAB]        |
| 56                             |
| 57 #8 osteopenia[TIAB]         |
| 58                             |
| 59                             |
| 60                             |

1  
2  
3  
4 #9 “Bone loss”  
5

6 #10 “bone losses”  
7

8  
9 #11 #5 OR #6 OR #7 OR #8 OR #9 OR #10  
10

11 #12 #4 AND #11  
12

13 #13 biphosphonate [TIAB]  
14

15 #14 diphosphonate [TIAB]  
16

17 #15 alendronate [TIAB]  
18

19 #16 risedronate [TIAB]  
20

21 #17 ibandronate [TIAB]  
22

23 # 18 pamidronate [TIAB]  
24

25 #19 ibandronate [TIAB]  
26

27 #20 zoledronate [TIAB]  
28

29 #21 #13 OR #14 OR #15 OR #16 OR #17 OR #18 OR #19 OR #20  
30

31 #22 #12 AND #21  
32

33 #23 limit #22 to human  
34  
35  
36  
37  
38

39  
40  
41 We will make relative modifications in accordance with the requirements, and an equivalent  
42 translation of the search terms will be adopted to ensure that similar search terms are used in  
43 all databases. If additional information is needed from the identified studies, we will contact  
44 the corresponding authors.  
45  
46  
47  
48  
49

### 50 2.3.2 Search for other resources

51 A manual search will also be performed to search the reference lists of the relevant articles.  
52  
53 Clinical trial registries (Clinicaltrials.gov, ICTRP in World Health Organization), conference  
54 presentations, and expert contacts will also be searched.  
55  
56  
57  
58  
59  
60



## 2.4 Data collection and analysis

### 2.4.1 Study selections

Potentially relevant papers will be assessed for eligibility by screening the title and abstract, and then they were finally selected after full-text review on the basis of the predefined selection criteria. The literature searching and selection process was initially performed by 1 review author and subsequently checked by the other author. Disagreements were resolved by discussion between the 2 authors.

All studies, identified by both electronic and manual searches, will be uploaded to Covidence [<https://www.covidence.org/>], and the reasons for excluding studies will be recorded and shown in a PRISMA flowchart.

### 2.4.2 Data extraction and management

We will extract the data on study information - publication year, language, sample size, and study design characteristics using a predetermined standard data extraction form. We will also extract characteristics that incidence of fractures and influence factors, such as gender, age, medications, and other treatments associated with fractures. Therapeutic modalities will be observed like kinds of drugs, dosage and frequency. Outcomes. We will perform a sensitivity analysis to verify the robustness of the results. This will be done by assessing the impact of sample size, high risk of bias (RoB), missing data, and selected models. Following the analyses, if the quality of the studies is judged to be low, these studies will be removed to ensure the robustness of the results.

### 2.4.3 Assessment of risk of bias and quality

The Cochrane Collaboration tool for assessing risk of bias 2 will be used to assess risk of bias for RCTs.<sup>14</sup> It contains six domains: selection bias (adequate sequence generation and

1  
2  
3  
4 allocation concealment); performance bias (blinding of participants); detection bias (blinding  
5 of outcome assessors); attrition bias (clear account of dropouts and exclusions); and reporting  
6 bias (selective outcome reporting). The Cochrane Risk Of Bias In Non-Randomized Studies –  
7 of Interventions (ROBINS-I) will be used to assess risk of bias for using quasi-RCT,  
8 controlled trials, cohort studies.<sup>15</sup> Two reviewers (CHM and JBH) will assess RoB of  
9 included studies independently. Disagreements will be resolved through discussion and, if not  
10 resolved, arbitration by other authors (JBH and AJH).

#### 21 2.4.4 Measurement of treatment effect

22  
23 For dichotomy data such as the incidence of fractures between the two groups, the pooled  
24 results are presented as risk ratio (RR) with 95% CIs. For continuous data, the pooled results  
25 are presented as mean differences (MDs) or standardized MDs (SMDs) with 95% confidence  
26 intervals (CIs).  
27  
28  
29  
30  
31

#### 33 2.4.5 Managing missing data

34  
35 We will contact the associated author and obtain essential information if there are missing,  
36 inadequate, or confusing data. If the information cannot be acquired, only the remaining  
37 accessible information, which will be discussed, will be analyzed.  
38  
39  
40  
41

#### 43 2.4.6 Assessment of heterogeneity

44  
45 To assess statistical heterogeneity, we will use the  $I^2$  test. If  $I^2$  is larger than 50%, statistical  
46 heterogeneity will be considered, so meta-analysis will not be conducted.<sup>16</sup>  
47  
48  
49

#### 51 2.4.7 Data synthesis

52  
53 The Review Manager program (ver. 5.4 Copenhagen: The Nordic Cochrane Center. The  
54 Cochrane Collaboration, 2014) and a random-effects model will be used for statistical  
55 analysis. The studies will be synthesized according to the type of intervention and/or as  
56 follows:  
57  
58  
59  
60

- 1
- 2
- 3
- 4 1. Comparison of the fracture rate of GIOP patients according to the type of
- 5
- 6 bisphosphonate
- 7
- 8
- 9 2. Rate of recurrence of fractures in GIOP patients who have experienced previous
- 10
- 11 fractures.
- 12

13 The heterogeneity levels in the collected literature will be analyzed. If enough studies are  
14 available to examine the causes of heterogeneity and its criteria, the categories listed below  
15 will be assessed. If the meta-analysis includes more than 10 studies, we will assess  
16 publication bias using Egger's test and visualize the results with a funnel plot.<sup>17</sup> If meta-  
17 analysis is not possible, it will be synthesized qualitatively, and this will be done according to  
18 the study design, the characteristics of the guidelines, and the outcome.  
19  
20  
21  
22  
23  
24  
25  
26  
27

#### 28 2.4.8 Subgroup analysis and sensitive analysis

29 We will perform a subgroup analysis to compare refracture rate on the GIOP patients who  
30 experience previous fracture history. This will be done by assessing the impact of sample  
31 size, high RoB, missing data, and selected models. Following the analyses, if the quality of  
32 the studies is judged to be low, these studies will be removed to ensure the robustness of the  
33 results.  
34  
35  
36  
37  
38  
39  
40  
41

#### 42 2.5. Ethics and dissemination

43 Because all of the data used in this study cited from published journals, ethical approval is  
44 not required.  
45  
46  
47  
48  
49

#### 50 2.6. Patient and public involvement

51 This meta-analysis was based on published data, hence no patient or public information will be  
52 included.  
53  
54  
55  
56  
57  
58  
59  
60

### 3. Discussion

Long-term usage of GCs results in a loss of bone mass and a higher risk of fracture. Furthermore, the most common cause of secondary osteoporosis is glucocorticoid-induced osteoporosis (GIOP). However, to our knowledge, there has been no systematic review comparing the effectiveness of BP on GIOP. Therefore, we developed a protocol to compare the effectiveness of BP on GIOP systematically. All actions in this review will be carried out following Cochrane Handbook 5.2.0 to provide convincing evidence and better guide clinic practice.

**Conflict of interest statement**

The authors have no conflict of interest to disclose.

**Author contributions**

Conceptualization: Jeonghoon Ahn, Bo-Hyoung Jang

Methodology: GaYoon Kim, Seowoo Bae, Hye Ju Lee, Seonghee Nam

Writing – original draft: Hongmin Chu

Writing – review & editing: Bo-hyung Jang, Jeonghoon Ahn

**Data sharing**

All data generated or analyzed during this study will be published in the peer-review article. Data sharing not applicable to this article as no datasets were generated or analyzed during the current study.

**Funding:**

This research was supported by a grant of Patient-Centered Clinical Research Coordinating Center (PACEN) funded by the Ministry of Health & Welfare, Republic of Korea (grant number : HC19C0047). This funding source had no role in the design of this study and will not have any role during its execution, analyses, interpretation of the data, or decision to submit results.

**Abbreviations:**

GIOP = Glucocorticoid-induced osteoporosis, GC = glucocorticoids, BP = Bisphosphonate, FRAX = Fracture Risk Assessment Tool, BMD = Bone Mineral Densitometer, PRISMA = Preferred Reporting Items for Systematic Reviews and Meta-Analysis Protocol, RCTs = randomized controlled trials, RoB = risk of bias

## Reference

1. Briot K, Roux C. Glucocorticoid-induced osteoporosis. *RMD Open*. 2015;1(1):e000014-e000014. doi:10.1136/rmdopen-2014-000014
2. Rizzoli R, Adachi JD, Cooper C, et al. Management of Glucocorticoid-Induced Osteoporosis. *Calcif Tissue Int*. 2012;91(4):225-243. doi:10.1007/s00223-012-9630-5
3. Canalis E, Mazziotti G, Giustina A, Bilezikian JP. Glucocorticoid-induced osteoporosis: pathophysiology and therapy. *Osteoporos Int*. 2007;18(10):1319-1328. doi:10.1007/s00198-007-0394-0
4. Koh JW, Kim J, Cho H, et al. Effects of Systemic Glucocorticoid Use on Fracture Risk: A Population-Based Study. *Endocrinol Metab*. 2020;35(3):562-570. doi:10.3803/EnM.2020.659
5. Weinstein RS. Is long-term glucocorticoid therapy associated with a high prevalence of asymptomatic vertebral fractures? *Nat Clin Pract Endocrinol Metab*. 2007;3(2):86-87. doi:10.1038/ncpendmet0372
6. Van Staa TP, Laan RF, Barton IP, Cohen S, Reid DM, Cooper C. Bone density threshold and other predictors of vertebral fracture in patients receiving oral glucocorticoid therapy. *Arthritis Rheum*. 2003;48(11):3224-3229. doi:10.1002/art.11283
7. Dong S li, Jiao Y, Yang H liang. Effectiveness of bisphosphonates on bone mineral density in osteopenic postmenopausal women: A systematic review and network meta-analysis of randomized controlled trials. *Medicine (Baltimore)*. 2021;100(31):e26715. doi:10.1097/MD.00000000000026715
8. Reginster JY, Burlet N, Close P, Bruyere O. Injectable Bisphosphonates for the Treatment of Osteoporosis. *Womens Health*. 2007;3(6):719-723. doi:10.2217/17455057.3.6.719
9. Page MJ, McKenzie JE, Bossuyt PM, et al. The PRISMA 2020 statement: An updated guideline for reporting systematic reviews. *PLOS Med*. 2021;18(3):e1003583. doi:10.1371/journal.pmed.1003583
10. Deeks ED. Denosumab: A Review in Postmenopausal Osteoporosis. *Drugs Aging*. 2018;35(2):163-173. doi:10.1007/s40266-018-0525-7
11. Kanis JA. Diagnosis of osteoporosis and assessment of fracture risk. *THE LANCET*. 2002;359:8.
12. Lee TH, Song YJ, Kim H, Sung YK, Cho SK. Intervention Thresholds for Treatment in Patients with Glucocorticoid-Induced Osteoporosis: Systematic Review of Guidelines. *J Bone Metab*. 2020;27(4):247-259. doi:10.11005/jbm.2020.27.4.247
13. Marques A, Ferreira RJO, Santos E, Loza E, Carmona L, da Silva JAP. The accuracy of osteoporotic fracture risk prediction tools: a systematic review and meta-analysis. *Ann Rheum Dis*. 2015;74(11):1958-1967. doi:10.1136/annrheumdis-2015-207907

- 1
  - 2
  - 3
  - 4
  - 5
  - 6
  - 7
  - 8
  - 9
  - 10
  - 11
  - 12
  - 13
  - 14
  - 15
  - 16
  - 17
  - 18
  - 19
  - 20
  - 21
  - 22
  - 23
  - 24
  - 25
  - 26
  - 27
  - 28
  - 29
  - 30
  - 31
  - 32
  - 33
  - 34
  - 35
  - 36
  - 37
  - 38
  - 39
  - 40
  - 41
  - 42
  - 43
  - 44
  - 45
  - 46
  - 47
  - 48
  - 49
  - 50
  - 51
  - 52
  - 53
  - 54
  - 55
  - 56
  - 57
  - 58
  - 59
  - 60
14. Higgins JPT, Altman DG, Gotzsche PC, et al. The Cochrane Collaboration's tool for assessing risk of bias in randomised trials. *BMJ*. 2011;343(oct18 2):d5928-d5928. doi:10.1136/bmj.d5928
15. Sterne JA, Hernán MA, Reeves BC, et al. ROBINS-I: a tool for assessing risk of bias in non-randomised studies of interventions. *BMJ*. Published online October 12, 2016:i4919. doi:10.1136/bmj.i4919
16. Huedo-Medina TB, Sánchez-Meca J, Marín-Martínez F, Botella J. Assessing heterogeneity in meta-analysis: Q statistic or I<sup>2</sup> index? *Psychol Methods*. 2006;11(2):193-206. doi:10.1037/1082-989X.11.2.193
17. Egger M, Smith GD, Schneider M, Minder C. Bias in meta-analysis detected by a simple, graphical test. *BMJ*. 1997;315(7109):629-634. doi:10.1136/bmj.315.7109.629

**PRISMA-P (Preferred Reporting Items for Systematic review and Meta-Analysis Protocols) 2015 checklist: recommended items to address in a systematic review protocol\***

| Section and topic                 | Item No | Checklist item                                                                                                                                                                                                                |            |
|-----------------------------------|---------|-------------------------------------------------------------------------------------------------------------------------------------------------------------------------------------------------------------------------------|------------|
| <b>ADMINISTRATIVE INFORMATION</b> |         |                                                                                                                                                                                                                               |            |
| Title:                            |         |                                                                                                                                                                                                                               |            |
| Identification                    | 1a      | Identify the report as a protocol of a systematic review                                                                                                                                                                      | 1          |
| Update                            | 1b      | If the protocol is for an update of a previous systematic review, identify as such                                                                                                                                            | 1          |
| Registration                      | 2       | If registered, provide the name of the registry (such as PROSPERO) and registration number                                                                                                                                    | 1          |
| Authors:                          |         |                                                                                                                                                                                                                               |            |
| Contact                           | 3a      | Provide name, institutional affiliation, e-mail address of all protocol authors; provide physical mailing address of corresponding author                                                                                     | Title page |
| Contributions                     | 3b      | Describe contributions of protocol authors and identify the guarantor of the review                                                                                                                                           | 10         |
| Amendments                        | 4       | If the protocol represents an amendment of a previously completed or published protocol, identify as such and list changes; otherwise, state plan for documenting important protocol amendments                               | N/A        |
| Support:                          |         |                                                                                                                                                                                                                               |            |
| Sources                           | 5a      | Indicate sources of financial or other support for the review                                                                                                                                                                 | 10         |
| Sponsor                           | 5b      | Provide name for the review funder and/or sponsor                                                                                                                                                                             | 10         |
| Role of sponsor or funder         | 5c      | Describe roles of funder(s), sponsor(s), and/or institution(s), if any, in developing the protocol                                                                                                                            | 10         |
| <b>INTRODUCTION</b>               |         |                                                                                                                                                                                                                               |            |
| Rationale                         | 6       | Describe the rationale for the review in the context of what is already known                                                                                                                                                 | 2          |
| Objectives                        | 7       | Provide an explicit statement of the question(s) the review will address with reference to participants, interventions, comparators, and outcomes (PICO)                                                                      | 2          |
| <b>METHODS</b>                    |         |                                                                                                                                                                                                                               |            |
| Eligibility criteria              | 8       | Specify the study characteristics (such as PICO, study design, setting, time frame) and report characteristics (such as years considered, language, publication status) to be used as criteria for eligibility for the review | 5,6        |
| Information sources               | 9       | Describe all intended information sources (such as electronic databases, contact with study authors, trial registers or other grey literature sources) with planned dates of coverage                                         | 5,6        |
| Search strategy                   | 10      | Present draft of search strategy to be used for at least one electronic database, including planned limits, such that it could be repeated                                                                                    | Table 1    |



|                                    |     |                                                                                                                                                                                                                                                           |       |
|------------------------------------|-----|-----------------------------------------------------------------------------------------------------------------------------------------------------------------------------------------------------------------------------------------------------------|-------|
| Study records:                     |     |                                                                                                                                                                                                                                                           |       |
| Data management                    | 11a | Describe the mechanism(s) that will be used to manage records and data throughout the review                                                                                                                                                              | 6     |
| Selection process                  | 11b | State the process that will be used for selecting studies (such as two independent reviewers) through each phase of the review (that is, screening, eligibility and inclusion in meta-analysis)                                                           | 6     |
| Data collection process            | 11c | Describe planned method of extracting data from reports (such as piloting forms, done independently, in duplicate), any processes for obtaining and confirming data from investigators                                                                    | 6     |
| Data items                         | 12  | List and define all variables for which data will be sought (such as PICO items, funding sources), any pre-planned data assumptions and simplifications                                                                                                   | 5,6,7 |
| Outcomes and prioritization        | 13  | List and define all outcomes for which data will be sought, including prioritization of main and additional outcomes, with rationale                                                                                                                      | 7,8   |
| Risk of bias in individual studies | 14  | Describe anticipated methods for assessing risk of bias of individual studies, including whether this will be done at the outcome or study level, or both; state how this information will be used in data synthesis                                      | 8     |
| Data synthesis                     | 15a | Describe criteria under which study data will be quantitatively synthesised                                                                                                                                                                               | 8,9   |
|                                    | 15b | If data are appropriate for quantitative synthesis, describe planned summary measures, methods of handling data and methods of combining data from studies, including any planned exploration of consistency (such as I <sup>2</sup> , Kendall's $\tau$ ) | 8,9   |
|                                    | 15c | Describe any proposed additional analyses (such as sensitivity or subgroup analyses, meta-regression)                                                                                                                                                     | 8,9   |
|                                    | 15d | If quantitative synthesis is not appropriate, describe the type of summary planned                                                                                                                                                                        | 8,9   |
| Meta-bias(es)                      | 16  | Specify any planned assessment of meta-bias(es) (such as publication bias across studies, selective reporting within studies)                                                                                                                             | 9     |
| Confidence in cumulative evidence  | 17  | Describe how the strength of the body of evidence will be assessed (such as GRADE)                                                                                                                                                                        | N/A   |

**\* It is strongly recommended that this checklist be read in conjunction with the PRISMA-P Explanation and Elaboration (cite when available) for important clarification on the items. Amendments to a review protocol should be tracked and dated. The copyright for PRISMA-P (including checklist) is held by the PRISMA-P Group and is distributed under a Creative Commons Attribution Licence 4.0.**

*From: Shamseer L, Moher D, Clarke M, Ghersi D, Liberati A, Petticrew M, Shekelle P, Stewart L, PRISMA-P Group. Preferred reporting items for systematic review and meta-analysis protocols (PRISMA-P) 2015: elaboration and explanation. BMJ. 2015 Jan 2;349(jan02 1):g7647.*

# BMJ Open

## Bisphosphonate in the effectiveness of Glucocorticoid-induced osteoporosis (GIOP) and for the prevention of re-fracture: a protocol for systematic review and meta-analysis

|                                 |                                                                                                                                                                                                                                                                                                                                                                                                                                                                                                    |
|---------------------------------|----------------------------------------------------------------------------------------------------------------------------------------------------------------------------------------------------------------------------------------------------------------------------------------------------------------------------------------------------------------------------------------------------------------------------------------------------------------------------------------------------|
| Journal:                        | <i>BMJ Open</i>                                                                                                                                                                                                                                                                                                                                                                                                                                                                                    |
| Manuscript ID                   | bmjopen-2022-062537.R1                                                                                                                                                                                                                                                                                                                                                                                                                                                                             |
| Article Type:                   | Protocol                                                                                                                                                                                                                                                                                                                                                                                                                                                                                           |
| Date Submitted by the Author:   | 24-Jul-2022                                                                                                                                                                                                                                                                                                                                                                                                                                                                                        |
| Complete List of Authors:       | Chu, Hongmin; Ongjin public healthcenter, Daecheong Public Health Subcenter<br>Jang, Bo-Hyoung; Kyung Hee University College of Korean Medicine, Department of Preventive Medicine<br>Kim, GaYoon; Ewha Womans University, Department of Health Convergence<br>Bae, Seowoo; National Cancer Center, National Cancer Control Institute<br>Lee, Hyeju; Ewha Womans University,<br>Nam, Seonghee; Ewha Womans University,<br>Ahn, Jeonghoon; Ewha Womans University, Department of Health Convergence |
| <b>Primary Subject Heading</b>: | Medical management                                                                                                                                                                                                                                                                                                                                                                                                                                                                                 |
| Secondary Subject Heading:      | Evidence based practice                                                                                                                                                                                                                                                                                                                                                                                                                                                                            |
| Keywords:                       | Bone diseases < ORTHOPAEDIC & TRAUMA SURGERY, CLINICAL PHYSIOLOGY, Protocols & guidelines < HEALTH SERVICES ADMINISTRATION & MANAGEMENT                                                                                                                                                                                                                                                                                                                                                            |
|                                 |                                                                                                                                                                                                                                                                                                                                                                                                                                                                                                    |

SCHOLARONE™  
Manuscripts

1  
2  
3  
4  
5  
6  
7  
8  
9  
10  
11  
12  
13  
14  
15  
16  
17  
18  
19  
20  
21  
22

# Bisphosphonate in the effectiveness of Glucocorticoid-induced osteoporosis (GIOP) and for the prevention of re-fracture: a protocol for systematic review and meta-analysis

23  
24  
25  
26  
27  
28  
29  
30  
31  
32  
33

Hongmin Chu, KMD, Ph.D<sup>1,a</sup>, Bo-Hyoung Jang KMD, MPH, Ph.D<sup>2,a</sup>, GaYoon Kim<sup>3</sup>, Sewoo Bae, M.A.<sup>4</sup>, Hyeju Lee, B.A.<sup>3</sup>, Seonghee Nam, B.A.<sup>3</sup>, Jeonghoon Ahn Ph.D.<sup>3\*</sup>

1. Daecheong Public Health Subcenter, Ongjin-gun, Incheon, Korea
  2. Department of Preventive Medicine, College of Korean Medicine, Kyung Hee University, Seoul, Republic of Korea
  3. Department of Health Convergence, Ewha Womans University, Seoul, Korea
  4. National Cancer Control Institute, National Cancer Center, Goyang, Korea
- a. Two authors are contributed equally.

34  
35  
36  
37  
38  
39  
40  
41  
42  
43  
44  
45  
46  
47  
48  
49  
50  
51  
52  
53  
54  
55  
56  
57  
58  
59  
60

\*Correspondence: Jeonghoon Ahn, Department of Health Convergence, Ewha Womans University, 52, Ewhayodae-gil, Seodaemun-gu, Seoul, Republic of Korea (e-mail: ahnjeonghoon@ewha.ac.kr).

# Bisphosphonate in the effectiveness of Glucocorticoid-induced osteoporosis (GIOP) and for the prevention of re-fracture: a protocol for systematic review and meta-analysis

## Abstract

Background: Long-term usage of Glucocorticoid results in a loss of bone mass and a higher risk of fracture and the most common cause of secondary osteoporosis is glucocorticoid-induced osteoporosis (GIOP). For preventing GIOP, Bisphosphonate (BP) is widely used. However, the analysis on the BP's effect of prevention of re-fracture is insufficient. The purpose of the present study is to evaluate the comparative treatment effect and prevention of re-fracture according to the type of bisphosphonate in GIOP as the basis for reliable clinical strategies for patients.

Methods: Electronic databases searches of the PubMed, Cochrane Library, EMBASE will be performed. Randomized controlled trials (RCTs), quasi-RCTs, controlled trials, and cohort studies evaluating effectiveness of BP to the GIOP patients will be included in this study. The primary outcome will be the incidence of hip, vertebral, and other fractures. The secondary outcome will include percentage changes on the Bone Mineral Density and incidence of re-fracture. Assessing risk of bias for included studies is assessed using the Cochrane Risk of Bias tool and Risk Of Bias In Non-randomized Studies – of Intervention tool. If quantitative synthesis is possible, a meta-analysis will be performed. A subgroup analysis will be conducted to compare refracture rate on the GIOP patients who experience previous fracture history.

Results: This study result will provide evidence for the effectiveness of the BP for the prevention of refracture on the GIOP

Conclusion: This study will provide fundamental data for prospective research on the application of BP in GIOP patients

Protocol registry number of online registry: This study protocol was registered in the International Prospective Register of Systematic Reviews (PROSPERO) (Registration ID: CRD42022343787)

URL of the registry: [https://www.crd.york.ac.uk/prospero/display\\_record.php?RecordID=343787](https://www.crd.york.ac.uk/prospero/display_record.php?RecordID=343787)

1  
2  
3  
4 Abbreviations: GIOP = Glucocorticoid-induced osteoporosis, GC = glucocorticoids, BP =  
5 Bisphosphonate, FRAX = Fracture Risk Assessment Tool, BMD = Bone Mineral Densitometer, PRISMA  
6 = Preferred Reporting Items for Systematic Reviews and Meta-Analysis Protocol, RCTs = randomized  
7 controlled trials, RoB = risk of bias  
8  
9  
10

11 Keywords: FRAX, BMD, GIOP, osteoporosis  
12  
13  
14  
15

#### 16 Strengths and limitations of this study

17  
18 This systematic review will follow the guidelines of Preferred Reporting Items for Systematic Reviews  
19 and Meta-analyses (PRISMA) for ensuring transparency and rigor of review.  
20

- 21 ▶ This protocol will be the first to assess the treatment effect of BP in GIOP patients.
- 22
- 23 ▶ In particular, since there are few papers based on fracture rate in RCT, we intend to include  
24 observational studies.  
25
- 26 ▶ Through this study, it is possible to suggest the direction of future clinical research and help  
27 design.  
28  
29  
30  
31  
32  
33  
34  
35  
36  
37  
38  
39  
40  
41  
42  
43  
44  
45  
46  
47  
48  
49  
50  
51  
52  
53  
54  
55  
56  
57  
58  
59  
60

## 1. Introduction

Glucocorticoid-induced osteoporosis (GIOP) is a serious side effect of glucocorticoids (GC), which are used for the treatment of inflammatory conditions.[1,2] It causes an increased risk of fracture and bone loss and has been reported to occur in as many as 30-50% of patients who receive chronic glucocorticoid therapy.[3] The duration and dose of GCs both increase the risk of fracture.[1,4] The incidence of fractures of patients who received long-term GC treatment was twice as high as that of those who received short-term GC treatment.[5,6] In addition, the higher the dosage, the more likely a fracture may occur.[4]

Bisphosphonate (BP) is widely used as a treatment for osteoporosis with mechanisms such as inhibition of bone resorption through osteoclast inhibition, inhibition of osteoclast formation, and increased production of osteoprotegerin.[7] In particular, there are injections and oral preparations for BP. Oral intake drugs such as alendronate, risedronate, and ibandronate are used widely. For injections, pamidronate, ibandronate, and zoledronate are used. In particular, injections only need to be administered once a month, or once at three months, so they have the advantage of high compliance in elderly patients who are taking multiple drugs, and their absorption rate is also high compared to oral drugs, so it is widely used.[8]

In the previous study, there is a study comparing the effects of BP on osteopenic postmenopausal women.[7] However, systematic reviews and meta-analysis according to the type of BP were not performed for GIOP patients. In addition, although Fracture Risk Assessment Tool (FRAX) is widely used internationally in diagnosing GIOP, it is also diagnosed based on Bone Mineral Densitometer (BMD).[2] So both indicators should be included and analyzed together. Moreover, in the case of past fractures among GIOP patients, the analysis on the BP's effect of prevention of re-fracture is insufficient. The purpose of the present study is to evaluate the comparative treatment effect and prevention of re-fracture

1  
2  
3  
4 according to the type of bisphosphonate in GIOP patients.  
5  
6  
7  
8  
9

## 10 **2. Methods**

### 11 12 13 2.1 Study registration

14  
15 The protocol of this study complied with the Preferred Reporting Items for Systematic  
16 Reviews and Meta-Analysis Protocol (PRISMA) guidelines.[9] This systematic review  
17  
18 protocol was registered in open in the International Prospective Register of Systematic  
19  
20 Reviews (PROSPERO) (Registration ID: CRD42022343787, URL:  
21  
22  
23 [https://www.crd.york.ac.uk/prospero/display\\_record.php?RecordID=343787](https://www.crd.york.ac.uk/prospero/display_record.php?RecordID=343787))  
24  
25  
26  
27  
28  
29  
30

### 31 2.2 Eligible criteria for study selection

#### 32 33 2.2.1 Types of studies

34  
35 Peer-reviewed and published experimental randomized controlled trials (RCTs), quasi-  
36  
37 randomized controlled trials, controlled trials, observational study indicating will be included  
38  
39 in the search. Other reference or studies of related GIOP and Fracture will be checked and  
40  
41 hand-searched for prospective inclusion.  
42  
43  
44  
45

#### 46 2.2.2 Types of participants

47  
48 Eligible participants will be GIOP patients diagnosed with a BMD score (less than or equal to  
49  
50 2.5) or FRAX guidelines. There will be no restrictions based on sex, ethnicity, symptom  
51  
52 severity, disease duration, and clinical setting. There are no limits based on gender, race, the  
53  
54 severity of symptoms, the length of the condition, or the clinical environment.  
55  
56  
57

#### 58 2.2.3 Types of interventions and comparators

59  
60

1  
2  
3  
4 We will include treatment in which osteoporosis was diagnosed based on using FRAX or  
5  
6 BMD. Control group will be divided into each type of active agents and placebo for comparing  
7  
8 effect size according to the type of controls. The comparison will be conducted between the  
9  
10 Bisphosphonate treatments and other pharmacological interventions used for treatment  
11  
12 GIOP such as selective estrogen receptor modulator (SERM) like denosumab or fluoride  
13  
14 (teriparatide) and alendronate, risedronate and placebo controls.[10–12]  
15  
16  
17  
18  
19  
20  
21

#### 22 2.2.4 Types of outcome measures

23  
24 The primary outcome will be the incidence of fracture including hip, vertebral, and other  
25  
26 kinds of all fractures. The secondary outcome will include percentage changes on the Bone  
27  
28 Mineral Density and incidence of re-fracture. For evaluating safety of BP, rate of adverse  
29  
30 events including cancer, cardiovascular disease, death, osteonecrosis of the jaw.[13]  
31  
32  
33  
34  
35

### 36 2.3 Search strategies for the identification of studies

#### 37 2.3.1 Electronic searches

38  
39  
40 The following electronic databases will be searched from inception to 2021: PubMed,  
41  
42 EMBASE, the Cochrane Central Register of Controlled Trials (CENTRAL). The specific  
43  
44 search strategies (for example, PubMed) are listed in Table 1. For making precise searching  
45  
46 strategies, we look up several reviews of osteoporosis.[14–16]  
47  
48  
49

50 We will make relative modifications in accordance with the requirements, and an equivalent  
51  
52 translation of the search terms will be adopted to ensure that similar search terms are used in  
53  
54 all databases. If additional information is needed from the identified studies, we will contact  
55  
56 the corresponding authors.  
57  
58  
59  
60



### 2.3.2 Search for other resources

A manual search will also be performed to search the reference lists of the relevant articles. Clinical trial registries (Clinicaltrials.gov, ICTRP in World Health Organization), conference presentations, and expert contacts will also be searched.

## 2.4 Data collection and analysis

### 2.4.1 Study selections

Potentially relevant papers will be assessed for eligibility by screening the title and abstract, and then they were finally selected after full-text review on the basis of the predefined selection criteria. The literature searching and selection process was initially performed by 1 review author and subsequently checked by the other author. Disagreements were resolved by discussion between the 2 authors.

All studies, identified by both electronic and manual searches, will be uploaded to Covidence [<https://www.covidence.org/>], and the reasons for excluding studies will be recorded and shown in a PRISMA flowchart.

### 2.4.2 Data extraction and management

We will extract the data on study information - publication year, language, sample size, and study design characteristics using a predetermined standard data extraction form. We will also extract characteristics that incidence of fractures and influence factors, such as gender, age, medications, and other treatments associated with fractures. Therapeutic modalities will be observed like kinds of drugs, dosage and frequency outcomes. We will perform a sensitivity analysis to verify the robustness of the results. This will be done by assessing the impact of sample size, high risk of bias (RoB), missing data, and selected models. Following the analyses, if the quality of the studies is judged to be low, these studies will be removed to

1  
2  
3  
4 ensure the robustness of the results.  
5  
6

#### 7 2.4.3 Assessment of risk of bias and quality 8

9 The Cochrane Collaboration tool for assessing risk of bias 2 will be used to assess risk of bias  
10 for RCTs.[17] It contains six domains: selection bias (adequate sequence generation and  
11 allocation concealment); performance bias (blinding of participants); detection bias (blinding  
12 of outcome assessors); attrition bias (clear account of dropouts and exclusions); and reporting  
13 bias (selective outcome reporting). The Cochrane Risk Of Bias In Non-Randomized Studies –  
14 of Interventions (ROBINS-I) will be used to assess risk of bias for using quasi-RCT,  
15 controlled trials, cohort studies.[18] Two reviewers (CHM and JBH) will assess RoB of  
16 included studies independently. Disagreements will be resolved through discussion and, if not  
17 resolved, arbitration by other authors (JBH and AJH).  
18  
19  
20  
21  
22  
23  
24  
25  
26  
27  
28  
29

#### 30 2.4.4 Measurement of treatment effect 31

32 For dichotomy data such as the incidence of fractures between the two groups, the pooled  
33 results are presented as risk ratio (RR) with 95% CIs. For continuous data, the pooled results  
34 are presented as mean differences (MDs) or standardized MDs (SMDs) with 95% confidence  
35 intervals (CIs).  
36  
37  
38  
39  
40  
41  
42

#### 43 2.4.5 Managing missing data 44

45 We will contact the associated author and obtain essential information if there are missing,  
46 inadequate, or confusing data. If the information cannot be acquired, only the remaining  
47 accessible information, which will be discussed, will be analyzed.  
48  
49  
50  
51

#### 52 2.4.6 Assessment of heterogeneity 53

54 To assess statistical heterogeneity, we will use the  $I^2$  test. If  $I^2$  is larger than 50%, statistical  
55 heterogeneity will be considered.[19] The heterogeneity levels in the collected literature will  
56 be analyzed (large if  $I^2 > 50%$ ; medium if  $25% < I^2 \leq 50%$ ; and small if  $0 \leq I^2 \leq 25%$ ). Fixed-  
57  
58  
59  
60

1  
2  
3  
4 effect model analysis will be carried out if there is no evidence of heterogeneity. However,  
5  
6 random-effects model analysis will be performed if the heterogeneity have been eliminated.  
7  
8

#### 9 10 2.4.7 Data synthesis

11 The Review Manager program (ver. 5.4 Copenhagen: The Nordic Cochrane Center. The  
12  
13 Cochrane Collaboration, 2014) and a random-effects model will be used for statistical  
14  
15 analysis. The studies will be synthesized according to the type of intervention and/or as  
16  
17 follows:  
18  
19

- 20  
21 1. Comparison of the fracture rate of GIOP patients according to the type of  
22  
23 bisphosphonate and controls  
24  
25
- 26  
27 2. Rate of recurrence of fractures in GIOP patients who have experienced previous  
28  
29 fractures.  
30

31 If the meta-analysis includes more than 10 studies, we will assess publication bias using  
32  
33 Egger's test and visualize the results with a funnel plot.[20] If meta-analysis is not possible, it  
34  
35 will be synthesized qualitatively, and this will be done according to the study design, the  
36  
37 characteristics of the guidelines, and the outcomes.  
38  
39

#### 40 41 2.4.8 Subgroup analysis and sensitive analysis

42 We will perform a subgroup analysis to compare re- fracture rate on the GIOP patients who  
43  
44 experience previous fracture history. This will be done by assessing the impact of sample  
45  
46 size, high Risk of Bias, missing data, and selected models. Following the analyses, if the  
47  
48 quality of the studies is judged to be low, these studies will be removed to ensure the  
49  
50 robustness of the results.  
51  
52

#### 53 54 55 2.5. Ethics and dissemination

56  
57  
58 Because all of the data used in this study cited from published journals, ethical approval is  
59  
60

1  
2  
3  
4 not required.  
5  
6

7 2.6. Patient and public involvement  
8  
9

10 This meta-analysis was based on published data, hence no patient or public information will be  
11 included.  
12  
13  
14  
15  
16  
17  
18  
19  
20  
21  
22  
23  
24  
25  
26  
27  
28  
29  
30  
31  
32  
33  
34  
35  
36  
37  
38  
39  
40  
41  
42  
43  
44  
45  
46  
47  
48  
49  
50  
51  
52  
53  
54  
55  
56  
57  
58  
59  
60

For peer review only

### 3. Discussion

Long-term usage of GCs results in a loss of bone mass and a higher risk of fracture.

Furthermore, the most common cause of secondary osteoporosis is glucocorticoid-induced osteoporosis (GIOP). However, to our knowledge, there has been no systematic review comparing the effectiveness of BP on GIOP. Therefore, we developed a protocol to compare the effectiveness of BP on GIOP systematically. All actions in this review will be carried out following Cochrane Handbook 5.2.0 to provide convincing evidence and better guide clinic practice.

#### **Ethics and dissemination**

This is protocol for systematic review and institutional review board approval and consent of the subject are not required.

1  
2  
3  
4 **Conflict of interest statement**  
5

6 No, there are no competing interests for any author  
7  
8  
9

10  
11 **Author contributions**  
12

13  
14 Conceptualization: Jeonghoon Ahn, Bo-Hyoung Jang  
15

16 Methodology: GaYoon Kim, Seowoo Bae, Hyeju Lee, Seonghee Nam  
17

18 Writing – original draft: Hongmin Chu  
19

20  
21 Writing – review & editing: Bo-hyung Jang, Jeonghoon Ahn  
22  
23

24  
25 **Data sharing**  
26

27  
28 Not applicable  
29  
30

31  
32 **Funding:**  
33

34  
35 Ministry of Health & Welfare, Republic of Korea. Patient-Centered Clinical Research  
36 Coordinating Center (Grant number : HC19C0047)  
37  
38  
39  
40  
41  
42  
43  
44  
45  
46  
47  
48  
49  
50  
51  
52  
53  
54  
55  
56  
57  
58  
59  
60

## Reference

1. Briot K, Roux C. Glucocorticoid-induced osteoporosis. *RMD Open*. 2015;1(1):e000014-e000014. doi:10.1136/rmdopen-2014-000014
2. Rizzoli R, Adachi JD, Cooper C, et al. Management of Glucocorticoid-Induced Osteoporosis. *Calcif Tissue Int*. 2012;91(4):225-243. doi:10.1007/s00223-012-9630-5
3. Canalis E, Mazziotti G, Giustina A, Bilezikian JP. Glucocorticoid-induced osteoporosis: pathophysiology and therapy. *Osteoporos Int*. 2007;18(10):1319-1328. doi:10.1007/s00198-007-0394-0
4. Koh JW, Kim J, Cho H, et al. Effects of Systemic Glucocorticoid Use on Fracture Risk: A Population-Based Study. *Endocrinol Metab*. 2020;35(3):562-570. doi:10.3803/EnM.2020.659
5. Weinstein RS. Is long-term glucocorticoid therapy associated with a high prevalence of asymptomatic vertebral fractures? *Nat Clin Pract Endocrinol Metab*. 2007;3(2):86-87. doi:10.1038/ncpendmet0372
6. Van Staa TP, Laan RF, Barton IP, Cohen S, Reid DM, Cooper C. Bone density threshold and other predictors of vertebral fracture in patients receiving oral glucocorticoid therapy. *Arthritis Rheum*. 2003;48(11):3224-3229. doi:10.1002/art.11283
7. Dong S li, Jiao Y, Yang H liang. Effectiveness of bisphosphonates on bone mineral density in osteopenic postmenopausal women: A systematic review and network meta-analysis of randomized controlled trials. *Medicine (Baltimore)*. 2021;100(31):e26715. doi:10.1097/MD.00000000000026715
8. Reginster JY, Burlet N, Close P, Bruyere O. Injectable Bisphosphonates for the Treatment of Osteoporosis. *Womens Health*. 2007;3(6):719-723. doi:10.2217/17455057.3.6.719
9. Page MJ, McKenzie JE, Bossuyt PM, et al. The PRISMA 2020 statement: An updated guideline for reporting systematic reviews. *PLOS Med*. 2021;18(3):e1003583. doi:10.1371/journal.pmed.1003583
10. Deeks ED. Denosumab: A Review in Postmenopausal Osteoporosis. *Drugs Aging*. 2018;35(2):163-173. doi:10.1007/s40266-018-0525-7
11. Riggs. Teriparatide in the management of osteoporosis. *Clin Interv Aging*. 2008;Volume 2:499-507. doi:10.2147/CIA.S241
12. Ding L, Hu J, Wang D, et al. Efficacy and Safety of First- and Second-Line Drugs to Prevent Glucocorticoid-Induced Fractures. *J Clin Endocrinol Metab*. 2020;105(3):600-613. doi:10.1210/clinem/dgz023
13. Lin SY, Hung MC, Chang SF, Tsuang FY, Chang JZC, Sun JS. Efficacy and Safety of Postmenopausal Osteoporosis Treatments: A Systematic Review and Network Meta-Analysis of Randomized Controlled Trials. *J Clin Med*. 2021;10(14):3043. doi:10.3390/jcm10143043

14. Kanis JA. Diagnosis of osteoporosis and assessment of fracture risk. *THE LANCET*. 2002;359:8.
15. Lee TH, Song YJ, Kim H, Sung YK, Cho SK. Intervention Thresholds for Treatment in Patients with Glucocorticoid-Induced Osteoporosis: Systematic Review of Guidelines. *J Bone Metab*. 2020;27(4):247-259. doi:10.11005/jbm.2020.27.4.247
16. Marques A, Ferreira RJO, Santos E, Loza E, Carmona L, da Silva JAP. The accuracy of osteoporotic fracture risk prediction tools: a systematic review and meta-analysis. *Ann Rheum Dis*. 2015;74(11):1958-1967. doi:10.1136/annrheumdis-2015-207907
17. Higgins JPT, Altman DG, Gotzsche PC, et al. The Cochrane Collaboration's tool for assessing risk of bias in randomised trials. *BMJ*. 2011;343(oct18 2):d5928-d5928. doi:10.1136/bmj.d5928
18. Sterne JA, Hernán MA, Reeves BC, et al. ROBINS-I: a tool for assessing risk of bias in non-randomised studies of interventions. *BMJ*. Published online October 12, 2016:i4919. doi:10.1136/bmj.i4919
19. Huedo-Medina TB, Sánchez-Meca J, Marín-Martínez F, Botella J. Assessing heterogeneity in meta-analysis: Q statistic or I<sup>2</sup> index? *Psychol Methods*. 2006;11(2):193-206. doi:10.1037/1082-989X.11.2.193
20. Egger M, Smith GD, Schneider M, Minder C. Bias in meta-analysis detected by a simple, graphical test. *BMJ*. 1997;315(7109):629-634. doi:10.1136/bmj.315.7109.629



Table 1. Search strategy for medline (via PubMed).

|    |                                                          |
|----|----------------------------------------------------------|
| 1  | #1 steroid[MeSH terms]                                   |
| 2  |                                                          |
| 3  |                                                          |
| 4  |                                                          |
| 5  |                                                          |
| 6  |                                                          |
| 7  |                                                          |
| 8  | #2 steroid*[TIAB]                                        |
| 9  |                                                          |
| 10 |                                                          |
| 11 | #3 glucocorticoid*[TIAB]                                 |
| 12 |                                                          |
| 13 |                                                          |
| 14 | #4 #1 OR #2 OR #3                                        |
| 15 |                                                          |
| 16 |                                                          |
| 17 | #5 osteoporosis[MeSH terms]                              |
| 18 |                                                          |
| 19 | #6 osteoporos*[TIAB]                                     |
| 20 |                                                          |
| 21 | #7 osteoporos*[TIAB]                                     |
| 22 |                                                          |
| 23 | #8 osteopenia[TIAB]                                      |
| 24 |                                                          |
| 25 |                                                          |
| 26 | #9 “Bone loss”                                           |
| 27 |                                                          |
| 28 | #10 “bone losses”                                        |
| 29 |                                                          |
| 30 | #11 #5 OR #6 OR #7 OR #8 OR #9 OR #10                    |
| 31 |                                                          |
| 32 |                                                          |
| 33 | #12 #4 AND #11                                           |
| 34 |                                                          |
| 35 | #13 biphosphonate [TIAB]                                 |
| 36 |                                                          |
| 37 | #14 diphosphonate [TIAB]                                 |
| 38 |                                                          |
| 39 |                                                          |
| 40 | #15 alendronate [TIAB]                                   |
| 41 |                                                          |
| 42 | #16 risedronate [TIAB]                                   |
| 43 |                                                          |
| 44 | #17 ibandronate [TIAB]                                   |
| 45 |                                                          |
| 46 | # 18 pamidronate [TIAB]                                  |
| 47 |                                                          |
| 48 |                                                          |
| 49 | #19 ibandronate [TIAB]                                   |
| 50 |                                                          |
| 51 | #20 zoledronate [TIAB]                                   |
| 52 |                                                          |
| 53 | #21 #13 OR #14 OR #15 OR #16 OR #17 OR #18 OR #19 OR #20 |
| 54 |                                                          |
| 55 |                                                          |
| 56 | #22 #12 AND #21                                          |
| 57 |                                                          |
| 58 | #23 limit #22 to human                                   |
| 59 |                                                          |
| 60 |                                                          |

1  
2  
3  
4  
5  
6  
7  
8  
9  
10  
11  
12  
13  
14  
15  
16  
17  
18  
19  
20  
21  
22  
23  
24  
25  
26  
27  
28  
29  
30  
31  
32  
33  
34  
35  
36  
37  
38  
39  
40  
41  
42  
43  
44  
45  
46  
47  
48  
49  
50  
51  
52  
53  
54  
55  
56  
57  
58  
59  
60

For peer review only

**PRISMA-P (Preferred Reporting Items for Systematic review and Meta-Analysis Protocols) 2015 checklist: recommended items to address in a systematic review protocol\***

| Section and topic                 | Item No | Checklist item                                                                                                                                                                                                                |            |
|-----------------------------------|---------|-------------------------------------------------------------------------------------------------------------------------------------------------------------------------------------------------------------------------------|------------|
| <b>ADMINISTRATIVE INFORMATION</b> |         |                                                                                                                                                                                                                               |            |
| Title:                            |         |                                                                                                                                                                                                                               |            |
| Identification                    | 1a      | Identify the report as a protocol of a systematic review                                                                                                                                                                      | 1          |
| Update                            | 1b      | If the protocol is for an update of a previous systematic review, identify as such                                                                                                                                            | 1          |
| Registration                      | 2       | If registered, provide the name of the registry (such as PROSPERO) and registration number                                                                                                                                    | 1          |
| Authors:                          |         |                                                                                                                                                                                                                               |            |
| Contact                           | 3a      | Provide name, institutional affiliation, e-mail address of all protocol authors; provide physical mailing address of corresponding author                                                                                     | Title page |
| Contributions                     | 3b      | Describe contributions of protocol authors and identify the guarantor of the review                                                                                                                                           | 10         |
| Amendments                        | 4       | If the protocol represents an amendment of a previously completed or published protocol, identify as such and list changes; otherwise, state plan for documenting important protocol amendments                               | N/A        |
| Support:                          |         |                                                                                                                                                                                                                               |            |
| Sources                           | 5a      | Indicate sources of financial or other support for the review                                                                                                                                                                 | 10         |
| Sponsor                           | 5b      | Provide name for the review funder and/or sponsor                                                                                                                                                                             | 10         |
| Role of sponsor or funder         | 5c      | Describe roles of funder(s), sponsor(s), and/or institution(s), if any, in developing the protocol                                                                                                                            | 10         |
| <b>INTRODUCTION</b>               |         |                                                                                                                                                                                                                               |            |
| Rationale                         | 6       | Describe the rationale for the review in the context of what is already known                                                                                                                                                 | 2          |
| Objectives                        | 7       | Provide an explicit statement of the question(s) the review will address with reference to participants, interventions, comparators, and outcomes (PICO)                                                                      | 2          |
| <b>METHODS</b>                    |         |                                                                                                                                                                                                                               |            |
| Eligibility criteria              | 8       | Specify the study characteristics (such as PICO, study design, setting, time frame) and report characteristics (such as years considered, language, publication status) to be used as criteria for eligibility for the review | 5,6        |
| Information sources               | 9       | Describe all intended information sources (such as electronic databases, contact with study authors, trial registers or other grey literature sources) with planned dates of coverage                                         | 5,6        |
| Search strategy                   | 10      | Present draft of search strategy to be used for at least one electronic database, including planned limits, such that it could be repeated                                                                                    | Table 1    |

|                                    |     |                                                                                                                                                                                                                                                  |       |
|------------------------------------|-----|--------------------------------------------------------------------------------------------------------------------------------------------------------------------------------------------------------------------------------------------------|-------|
| Study records:                     |     |                                                                                                                                                                                                                                                  |       |
| Data management                    | 11a | Describe the mechanism(s) that will be used to manage records and data throughout the review                                                                                                                                                     | 6     |
| Selection process                  | 11b | State the process that will be used for selecting studies (such as two independent reviewers) through each phase of the review (that is, screening, eligibility and inclusion in meta-analysis)                                                  | 6     |
| Data collection process            | 11c | Describe planned method of extracting data from reports (such as piloting forms, done independently, in duplicate), any processes for obtaining and confirming data from investigators                                                           | 6     |
| Data items                         | 12  | List and define all variables for which data will be sought (such as PICO items, funding sources), any pre-planned data assumptions and simplifications                                                                                          | 5,6,7 |
| Outcomes and prioritization        | 13  | List and define all outcomes for which data will be sought, including prioritization of main and additional outcomes, with rationale                                                                                                             | 7,8   |
| Risk of bias in individual studies | 14  | Describe anticipated methods for assessing risk of bias of individual studies, including whether this will be done at the outcome or study level, or both; state how this information will be used in data synthesis                             | 8     |
| Data synthesis                     | 15a | Describe criteria under which study data will be quantitatively synthesised                                                                                                                                                                      | 8,9   |
|                                    | 15b | If data are appropriate for quantitative synthesis, describe planned summary measures, methods of handling data and methods of combining data from studies, including any planned exploration of consistency (such as $I^2$ , Kendall's $\tau$ ) | 8,9   |
|                                    | 15c | Describe any proposed additional analyses (such as sensitivity or subgroup analyses, meta-regression)                                                                                                                                            | 8,9   |
|                                    | 15d | If quantitative synthesis is not appropriate, describe the type of summary planned                                                                                                                                                               | 8,9   |
| Meta-bias(es)                      | 16  | Specify any planned assessment of meta-bias(es) (such as publication bias across studies, selective reporting within studies)                                                                                                                    | 9     |
| Confidence in cumulative evidence  | 17  | Describe how the strength of the body of evidence will be assessed (such as GRADE)                                                                                                                                                               | N/A   |

**\* It is strongly recommended that this checklist be read in conjunction with the PRISMA-P Explanation and Elaboration (cite when available) for important clarification on the items. Amendments to a review protocol should be tracked and dated. The copyright for PRISMA-P (including checklist) is held by the PRISMA-P Group and is distributed under a Creative Commons Attribution Licence 4.0.**

*From: Shamseer L, Moher D, Clarke M, Ghersi D, Liberati A, Petticrew M, Shekelle P, Stewart L, PRISMA-P Group. Preferred reporting items for systematic review and meta-analysis protocols (PRISMA-P) 2015: elaboration and explanation. BMJ. 2015 Jan 2;349(jan02 1):g7647.*

# BMJ Open

## Comparative effectiveness of bisphosphonate treatments for the prevention of re-fracture in glucocorticoid-induced osteoporosis: protocol for a systematic review and meta-analysis

|                                 |                                                                                                                                                                                                                                                                                                                                                                                                                                                                                                    |
|---------------------------------|----------------------------------------------------------------------------------------------------------------------------------------------------------------------------------------------------------------------------------------------------------------------------------------------------------------------------------------------------------------------------------------------------------------------------------------------------------------------------------------------------|
| Journal:                        | <i>BMJ Open</i>                                                                                                                                                                                                                                                                                                                                                                                                                                                                                    |
| Manuscript ID                   | bmjopen-2022-062537.R2                                                                                                                                                                                                                                                                                                                                                                                                                                                                             |
| Article Type:                   | Protocol                                                                                                                                                                                                                                                                                                                                                                                                                                                                                           |
| Date Submitted by the Author:   | 24-Aug-2022                                                                                                                                                                                                                                                                                                                                                                                                                                                                                        |
| Complete List of Authors:       | Chu, Hongmin; Ongjin public healthcenter, Daecheong Public Health Subcenter<br>Jang, Bo-Hyoung; Kyung Hee University College of Korean Medicine, Department of Preventive Medicine<br>Kim, GaYoon; Ewha Womans University, Department of Health Convergence<br>Bae, Seowoo; National Cancer Center, National Cancer Control Institute<br>Lee, Hyeju; Ewha Womans University,<br>Nam, Seonghee; Ewha Womans University,<br>Ahn, Jeonghoon; Ewha Womans University, Department of Health Convergence |
| <b>Primary Subject Heading</b>: | Medical management                                                                                                                                                                                                                                                                                                                                                                                                                                                                                 |
| Secondary Subject Heading:      | Evidence based practice                                                                                                                                                                                                                                                                                                                                                                                                                                                                            |
| Keywords:                       | Bone diseases < ORTHOPAEDIC & TRAUMA SURGERY, CLINICAL PHYSIOLOGY, Protocols & guidelines < HEALTH SERVICES ADMINISTRATION & MANAGEMENT                                                                                                                                                                                                                                                                                                                                                            |
|                                 |                                                                                                                                                                                                                                                                                                                                                                                                                                                                                                    |

SCHOLARONE™  
Manuscripts

# Comparative effectiveness of bisphosphonate treatments for the prevention of re-fracture in glucocorticoid-induced osteoporosis: protocol for a systematic review and meta-analysis

Hongmin Chu, KMD, Ph.D<sup>1,a</sup>, Bo-Hyoung Jang KMD, MPH, Ph.D<sup>2,a</sup>, GaYoon Kim<sup>3</sup>, Sewoo Bae, M.A.<sup>4</sup>, Hyeju Lee, B.A.<sup>3</sup>, Seonghee Nam, B.A.<sup>3</sup>, Jeonghoon Ahn Ph.D.<sup>3\*</sup>

1. Daecheong Public Health Subcenter, Ongjin-gun, Incheon, Korea
  2. Department of Preventive Medicine, College of Korean Medicine, Kyung Hee University, Seoul, Republic of Korea
  3. Department of Health Convergence, Ewha Womans University, Seoul, Korea
  4. National Cancer Control Institute, National Cancer Center, Goyang, Korea
- a. Two authors are contributed equally.

\*Correspondence: Jeonghoon Ahn, Department of Health Convergence, Ewha Womans University, 52, Ewhayeodae-gil, Seodaemun-gu, Seoul, Republic of Korea (e-mail: ahnjeonghoon@ewha.ac.kr).

# Comparative effectiveness of bisphosphonate treatments for the prevention of re-fracture in glucocorticoid-induced osteoporosis: protocol for a systematic review and meta-analysis

## Abstract

Background: Long-term usage of Glucocorticoid results in a loss of bone mass and a higher risk of fracture and the most common cause of secondary osteoporosis is glucocorticoid-induced osteoporosis (GIOP). For preventing GIOP, Bisphosphonate (BP) is widely used. However, the analysis on the BP's effect of prevention of re-fracture is insufficient. The purpose of the present study is to evaluate the comparative treatment effect and prevention of re-fracture according to the type of bisphosphonate in GIOP as the basis for reliable clinical strategies for patients.

Methods and analysis: We will search electronic databases searches of the PubMed, Cochrane Library, EMBASE using a comprehensive search strategy in Dec 2021 with no language restriction. Randomized controlled trials (RCTs), quasi-RCTs, controlled trials, and cohort studies evaluating effectiveness of BP to the GIOP patients will be included in this study. The primary outcome will be the incidence of hip, vertebral, and other fractures. The secondary outcome will include percentage changes on the Bone Mineral Density and incidence of re-fracture. Assessing risk of bias for included studies is assessed using the Cochrane Risk of Bias tool and Risk Of Bias In Non-randomized Studies – of Intervention tool. If quantitative synthesis is possible, a meta-analysis will be performed. A subgroup analysis will be conducted to compare refracture rate on the GIOP patients who experience previous fracture history. This study result will provide evidence for the effectiveness of the BP for the prevention of refracture on the GIOP

Ethics and dissemination: The results will be disseminated through publishing in a peer-reviewed journal or public presentations. Ethical approval is not required as this is a systematic review of publicly available data.

PROSPERO Registration ID: CRD42022343787

Abbreviations: GIOP = Glucocorticoid-induced osteoporosis, GC = glucocorticoids, BP = Bisphosphonate, FRAX = Fracture Risk Assessment Tool, BMD = Bone Mineral Densitometer, PRISMA = Preferred Reporting Items for Systematic Reviews and Meta-Analysis Protocol, RCTs = randomized

1  
2  
3  
4 controlled trials, RoB = risk of bias  
5

6  
7 Keywords: FRAX, BMD, GIOP, osteoporosis  
8  
9

10  
11 Strengths and limitations of this study  
12

13 ▶ This systematic review will follow the guidelines of Preferred Reporting Items for Systematic  
14 Reviews and Meta-analyses (PRISMA) for ensuring transparency and rigor of review.  
15

16  
17 ▶ In particular, since there are few papers based on fracture rate in RCT, we intend to include  
18 observational studies.  
19

20  
21 ▶ There is a limitation in that there is a possibility that research may exist other than the database  
22 that was the subject of this study.  
23  
24  
25  
26  
27  
28  
29  
30  
31  
32  
33  
34  
35  
36  
37  
38  
39  
40  
41  
42  
43  
44  
45  
46  
47  
48  
49  
50  
51  
52  
53  
54  
55  
56  
57  
58  
59  
60



## 1. Introduction

Glucocorticoid-induced osteoporosis (GIOP) is a serious side effect of glucocorticoids (GC), which are used for the treatment of inflammatory conditions.[1,2] It causes an increased risk of fracture and bone loss and has been reported to occur in as many as 30-50% of patients who receive chronic glucocorticoid therapy.[3] The duration and dose of GCs both increase the risk of fracture.[1,4] The incidence of fractures of patients who received long-term GC treatment was twice as high as that of those who received short-term GC treatment.[5,6] In addition, the higher the dosage, the more likely a fracture may occur.[4]

Bisphosphonate (BP) is widely used as a treatment for osteoporosis with mechanisms such as inhibition of bone resorption through osteoclast inhibition, inhibition of osteoclast formation, and increased production of osteoprotegerin.[7] In particular, there are injections and oral preparations for BP. Oral intake drugs such as alendronate, risedronate, and ibandronate are used widely. For injections, pamidronate, ibandronate, and zoledronate are used. In particular, injections only need to be administered once a month, or once at three months, so they have the advantage of high compliance in elderly patients who are taking multiple drugs, and their absorption rate is also high compared to oral drugs, so it is widely used.[8]

In the previous study, there is a study comparing the effects of BP on osteopenic postmenopausal women.[7] However, systematic reviews and meta-analysis according to the type of BP were not performed for GIOP patients. In addition, although Fracture Risk Assessment Tool (FRAX) is widely used internationally in diagnosing GIOP, it is also diagnosed based on Bone Mineral Densitometer (BMD).[2] So both indicators should be included and analyzed together. Moreover, in the case of past fractures among GIOP patients, the analysis on the BP's effect of prevention of re-fracture is insufficient. The purpose of the present study is to evaluate the comparative treatment effect and prevention of re-fracture

1  
2  
3  
4 according to the type of bisphosphonate in GIOP patients.  
5  
6  
7  
8  
9

## 10 **2. Methods**

### 11 12 13 2.1 Study registration

14  
15 The protocol of this study complied with the Preferred Reporting Items for Systematic  
16 Reviews and Meta-Analysis Protocol (PRISMA) guidelines.[9] This systematic review  
17  
18 protocol was registered in open in the International Prospective Register of Systematic  
19  
20 Reviews (PROSPERO) (Registration ID: CRD42022343787, URL:  
21  
22  
23 [https://www.crd.york.ac.uk/prospero/display\\_record.php?RecordID=343787](https://www.crd.york.ac.uk/prospero/display_record.php?RecordID=343787))  
24  
25  
26  
27  
28  
29  
30

### 31 2.2 Eligible criteria for study selection

#### 32 33 34 2.2.1 Types of studies

35  
36 Peer-reviewed and published experimental randomized controlled trials (RCTs), quasi-  
37  
38 randomized controlled trials, controlled trials, observational study indicating will be included  
39  
40 in the search. Other reference or studies of related GIOP and Fracture will be checked and  
41  
42 hand-searched for prospective inclusion.  
43  
44  
45

#### 46 47 2.2.2 Types of participants

48 Eligible participants will be GIOP patients diagnosed with a BMD score (less than or equal to  
49  
50 2.5) or FRAX guidelines. There will be no restrictions based on sex, ethnicity, symptom  
51  
52 severity, disease duration, and clinical setting. There are no limits based on gender, race, the  
53  
54 severity of symptoms, the length of the condition, or the clinical environment.  
55  
56  
57

#### 58 59 2.2.3 Types of interventions and comparators

60

1  
2  
3  
4 We will include treatment in which osteoporosis was diagnosed based on using FRAX or  
5  
6 BMD. Control group will be divided into each type of active agents and placebo for comparing  
7  
8 effect size according to the type of controls. The comparison will be conducted between the  
9  
10 Bisphosphonate treatments and other pharmacological interventions used for treatment  
11  
12 GIOP such as selective estrogen receptor modulator (SERM) like denosumab or fluoride  
13  
14 (teriparatide) and alendronate, risedronate and placebo controls.[10–12]  
15  
16  
17  
18  
19  
20  
21

#### 22 2.2.4 Types of outcome measures

23  
24 The primary outcome will be the incidence of fracture including hip, vertebral, and other  
25  
26 kinds of all fractures. The secondary outcome will include percentage changes on the Bone  
27  
28 Mineral Density and incidence of re-fracture. For evaluating safety of BP, rate of adverse  
29  
30 events including cancer, cardiovascular disease, death, osteonecrosis of the jaw.[13]  
31  
32  
33  
34  
35

### 36 2.3 Search strategies for the identification of studies

#### 37 2.3.1 Electronic searches

38  
39  
40 The following electronic databases will be searched from inception to December 2021:  
41  
42 PubMed, EMBASE, the Cochrane Central Register of Controlled Trials (CENTRAL). The  
43  
44 specific search strategies (for example, PubMed) are listed in Table 1. Other database's  
45  
46 strategies are listed in Supplement 1. For making precise searching strategies, we look up  
47  
48 several reviews of osteoporosis.[14–16] Furthermore, there will be no language restrictions.  
49  
50  
51

52  
53 We will make relative modifications in accordance with the requirements, and an equivalent  
54  
55 translation of the search terms will be adopted to ensure that similar search terms are used in  
56  
57 all databases. If additional information is needed from the identified studies, we will contact  
58  
59 the corresponding authors.  
60

### 2.3.2 Search for other resources

A manual search will also be performed to search the reference lists of the relevant articles. Clinical trial registries (Clinicaltrials.gov, ICTRP in World Health Organization), conference presentations, and expert contacts will also be searched.

## 2.4 Data collection and analysis

### 2.4.1 Study selections

Potentially relevant papers will be assessed for eligibility by screening the title and abstract, and then they were finally selected after full-text review on the basis of the predefined selection criteria. The literature searching and selection process was initially performed by 1 review author and subsequently checked by the other author. Disagreements were resolved by discussion between the 2 authors.

All studies, identified by both electronic and manual searches, will be uploaded to Covidence [<https://www.covidence.org/>], and the reasons for excluding studies will be recorded and shown in a PRISMA flowchart.

### 2.4.2 Data extraction and management

We will extract the data on study information - publication year, language, sample size, and study design characteristics using a predetermined standard data extraction form. We will also extract characteristics that incidence of fractures and influence factors, such as gender, age, medications, and other treatments associated with fractures. Therapeutic modalities will be observed like kinds of drugs, dosage and frequency outcomes. We will perform a sensitivity analysis to verify the robustness of the results. This will be done by assessing the impact of sample size, high risk of bias (RoB), missing data, and selected models. Following the analyses, if the quality of the studies is judged to be low, these studies will be removed to

1  
2  
3  
4 ensure the robustness of the results.  
5  
6

#### 7 2.4.3 Assessment of risk of bias and quality 8

9 The Cochrane Collaboration tool for assessing risk of bias 2 will be used to assess risk of bias  
10 for RCTs.[17] It contains six domains: selection bias (adequate sequence generation and  
11 allocation concealment); performance bias (blinding of participants); detection bias (blinding  
12 of outcome assessors); attrition bias (clear account of dropouts and exclusions); and reporting  
13 bias (selective outcome reporting). The Cochrane Risk Of Bias In Non-Randomized Studies –  
14 of Interventions (ROBINS-I) will be used to assess risk of bias for using quasi-RCT,  
15 controlled trials, cohort studies.[18] Two reviewers (CHM and JBH) will assess RoB of  
16 included studies independently. Disagreements will be resolved through discussion and, if not  
17 resolved, arbitration by other authors (JBH and AJH).  
18  
19  
20  
21  
22  
23  
24  
25  
26  
27  
28  
29

#### 30 2.4.4 Measurement of treatment effect 31

32 For dichotomy data such as the incidence of fractures between the two groups, the pooled  
33 results are presented as risk ratio (RR) with 95% CIs. For continuous data, the pooled results  
34 are presented as mean differences (MDs) or standardized MDs (SMDs) with 95% confidence  
35 intervals (CIs).  
36  
37  
38  
39  
40  
41  
42

#### 43 2.4.5 Managing missing data 44

45 We will contact the associated author and obtain essential information if there are missing,  
46 inadequate, or confusing data. If the information cannot be acquired, only the remaining  
47 accessible information, which will be discussed, will be analyzed.  
48  
49  
50  
51

#### 52 2.4.6 Assessment of heterogeneity 53

54 To assess statistical heterogeneity, we will use the  $I^2$  test. If  $I^2$  is larger than 50%, statistical  
55 heterogeneity will be considered.[19] The heterogeneity levels in the collected literature will  
56 be analyzed (large if  $I^2 > 50\%$ ; medium if  $25\% < I^2 \leq 50\%$ ; and small if  $0 \leq I^2 \leq 25\%$ ). Fixed-  
57  
58  
59  
60

1  
2  
3  
4 effect model analysis will be carried out if there is no evidence of heterogeneity. However,  
5  
6 random-effects model analysis will be performed if the heterogeneity have been eliminated.  
7  
8

#### 9 10 2.4.7 Data synthesis

11 The Review Manager program (ver. 5.4 Copenhagen: The Nordic Cochrane Center. The  
12  
13 Cochrane Collaboration, 2014) and a random-effects model will be used for statistical  
14  
15 analysis. The studies will be synthesized according to the type of intervention and/or as  
16  
17 follows:  
18  
19

- 20  
21 1. Comparison of the fracture rate of GIOP patients according to the type of  
22  
23 bisphosphonate and controls
- 24  
25 2. Rate of recurrence of fractures in GIOP patients who have experienced previous  
26  
27 fractures.  
28  
29

30  
31 If the meta-analysis includes more than 10 studies, we will assess publication bias using  
32  
33 Egger's test and visualize the results with a funnel plot.[20] If meta-analysis is not possible, it  
34  
35 will be synthesized qualitatively, and this will be done according to the study design, the  
36  
37 characteristics of the guidelines, and the outcomes.  
38  
39

#### 40 41 2.4.8 Subgroup analysis and sensitive analysis

42  
43 We will perform a subgroup analysis to compare re- fracture rate on the GIOP patients who  
44  
45 experience previous fracture history. This will be done by assessing the impact of sample  
46  
47 size, high Risk of Bias, missing data, and selected models. Following the analyses, if the  
48  
49 quality of the studies is judged to be low, these studies will be removed to ensure the  
50  
51 robustness of the results.  
52  
53

#### 54 55 2.4.9 Patient and Public Involvement

56  
57  
58 The design of this review protocol did not involve patients.  
59  
60

### 3. Discussion

Long-term usage of GCs results in a loss of bone mass and a higher risk of fracture. Furthermore, the most common cause of secondary osteoporosis is glucocorticoid-induced osteoporosis (GIOP). However, to our knowledge, there has been no systematic review comparing the effectiveness of BP on GIOP. Therefore, we developed a protocol to compare the effectiveness of BP on GIOP systematically. All actions in this review will be carried out following Cochrane Handbook 5.2.0 to provide convincing evidence and better guide clinic practice.

### 4. Ethics and dissemination

This meta-analysis was based on published data, hence no patient or public information will be included. After complete analysis, the article will be submitted for publication in a peer-reviewed journal. Results of this study may impact stakeholders such as clinical physicians, patients, and policy-makers in making better decisions. To disseminate the findings of this research, we also use seminars, social media, and conference.

**Competing interests**

No, there are no competing interests for any author

**Contributors**

Conceptualization: Jeonghoon Ahn, Bo-Hyoung Jang

Methodology: GaYoon Kim, Seowoo Bae, Hyeju Lee, Seonghee Nam

Writing – original draft: Hongmin Chu

Writing – review & editing: Bo-hyung Jang, Jeonghoon Ahn

**Funding:**

Ministry of Health & Welfare, Republic of Korea. Patient-Centered Clinical Research  
Coordinating Center (Grant number : HC19C0047)



## References

1. Briot K, Roux C. Glucocorticoid-induced osteoporosis. *RMD Open*. 2015;1(1):e000014-e000014. doi:10.1136/rmdopen-2014-000014
2. Rizzoli R, Adachi JD, Cooper C, et al. Management of Glucocorticoid-Induced Osteoporosis. *Calcif Tissue Int*. 2012;91(4):225-243. doi:10.1007/s00223-012-9630-5
3. Canalis E, Mazziotti G, Giustina A, Bilezikian JP. Glucocorticoid-induced osteoporosis: pathophysiology and therapy. *Osteoporos Int*. 2007;18(10):1319-1328. doi:10.1007/s00198-007-0394-0
4. Koh JW, Kim J, Cho H, et al. Effects of Systemic Glucocorticoid Use on Fracture Risk: A Population-Based Study. *Endocrinol Metab*. 2020;35(3):562-570. doi:10.3803/EnM.2020.659
5. Weinstein RS. Is long-term glucocorticoid therapy associated with a high prevalence of asymptomatic vertebral fractures? *Nat Clin Pract Endocrinol Metab*. 2007;3(2):86-87. doi:10.1038/ncpendmet0372
6. Van Staa TP, Laan RF, Barton IP, Cohen S, Reid DM, Cooper C. Bone density threshold and other predictors of vertebral fracture in patients receiving oral glucocorticoid therapy. *Arthritis Rheum*. 2003;48(11):3224-3229. doi:10.1002/art.11283
7. Dong S li, Jiao Y, Yang H liang. Effectiveness of bisphosphonates on bone mineral density in osteopenic postmenopausal women: A systematic review and network meta-analysis of randomized controlled trials. *Medicine (Baltimore)*. 2021;100(31):e26715. doi:10.1097/MD.00000000000026715
8. Reginster JY, Burlet N, Close P, Bruyere O. Injectable Bisphosphonates for the Treatment of Osteoporosis. *Womens Health*. 2007;3(6):719-723. doi:10.2217/17455057.3.6.719
9. Page MJ, McKenzie JE, Bossuyt PM, et al. The PRISMA 2020 statement: An updated guideline for reporting systematic reviews. *PLOS Med*. 2021;18(3):e1003583. doi:10.1371/journal.pmed.1003583
10. Deeks ED. Denosumab: A Review in Postmenopausal Osteoporosis. *Drugs Aging*. 2018;35(2):163-173. doi:10.1007/s40266-018-0525-7
11. Riggs. Teriparatide in the management of osteoporosis. *Clin Interv Aging*. 2008;Volume 2:499-507. doi:10.2147/CIA.S241
12. Ding L, Hu J, Wang D, et al. Efficacy and Safety of First- and Second-Line Drugs to Prevent Glucocorticoid-Induced Fractures. *J Clin Endocrinol Metab*. 2020;105(3):600-613. doi:10.1210/clinem/dgz023
13. Lin SY, Hung MC, Chang SF, Tsuang FY, Chang JZC, Sun JS. Efficacy and Safety of Postmenopausal Osteoporosis Treatments: A Systematic Review and Network Meta-Analysis of Randomized Controlled Trials. *J Clin Med*. 2021;10(14):3043. doi:10.3390/jcm10143043

- 1  
2  
3  
4 14. Kanis JA. Diagnosis of osteoporosis and assessment of fracture risk. *THE LANCET*.  
5 2002;359:8.  
6  
7  
8 15. Lee TH, Song YJ, Kim H, Sung YK, Cho SK. Intervention Thresholds for Treatment  
9 in Patients with Glucocorticoid-Induced Osteoporosis: Systematic Review of Guidelines. *J*  
10 *Bone Metab*. 2020;27(4):247-259. doi:10.11005/jbm.2020.27.4.247  
11  
12 16. Marques A, Ferreira RJO, Santos E, Loza E, Carmona L, da Silva JAP. The accuracy  
13 of osteoporotic fracture risk prediction tools: a systematic review and meta-analysis. *Ann*  
14 *Rheum Dis*. 2015;74(11):1958-1967. doi:10.1136/annrheumdis-2015-207907  
15  
16 17. Higgins JPT, Altman DG, Gotzsche PC, et al. The Cochrane Collaboration's tool for  
17 assessing risk of bias in randomised trials. *BMJ*. 2011;343(oct18 2):d5928-d5928.  
18 doi:10.1136/bmj.d5928  
19  
20 18. Sterne JA, Hernán MA, Reeves BC, et al. ROBINS-I: a tool for assessing risk of bias  
21 in non-randomised studies of interventions. *BMJ*. Published online October 12, 2016:i4919.  
22 doi:10.1136/bmj.i4919  
23  
24 19. Huedo-Medina TB, Sánchez-Meca J, Marín-Martínez F, Botella J. Assessing  
25 heterogeneity in meta-analysis: Q statistic or I<sup>2</sup> index? *Psychol Methods*. 2006;11(2):193-206.  
26 doi:10.1037/1082-989X.11.2.193  
27  
28 20. Egger M, Smith GD, Schneider M, Minder C. Bias in meta-analysis detected by a  
29 simple, graphical test. *BMJ*. 1997;315(7109):629-634. doi:10.1136/bmj.315.7109.629  
30  
31  
32  
33  
34  
35  
36  
37  
38  
39  
40  
41  
42  
43  
44  
45  
46  
47  
48  
49  
50  
51  
52  
53  
54  
55  
56  
57  
58  
59  
60

Table 1. Search strategy for medline (via PubMed).

#1 steroid[MeSH terms]  
#2 steroid\*[TIAB]  
#3 glucocorticoid\*[TIAB]  
#4 #1 OR #2 OR #3  
#5 osteoporosis[MeSH terms]  
#6 osteoporos\*[TIAB]  
#7 osteoporos\*[TIAB]  
#8 osteopenia[TIAB]  
#9 “Bone loss”  
#10 “bone losses”  
#11 #5 OR #6 OR #7 OR #8 OR #9 OR #10  
#12 #4 AND #11  
#13 biphosphonate [TIAB]  
#14 diphosphonate [TIAB]  
#15 alendronate [TIAB]  
#16 risedronate [TIAB]  
#17 ibandronate [TIAB]  
# 18 pamidronate [TIAB]  
#19 zoledronate [TIAB]  
#20 #13 OR #14 OR #15 OR #16 OR #17 OR #18 OR #19  
#21 #12 AND #20  
#22 limit #21 to human

## Supplement 1. Searching strategies of EMBASE

## 1. embase

|    |                                                                                                                                                                                       |
|----|---------------------------------------------------------------------------------------------------------------------------------------------------------------------------------------|
| #1 | 'steroid'/exp OR 'steroid':ab,ti OR 'glucocorticoid'/exp OR 'glucocorticoid':ab,ti OR                                                                                                 |
| #2 | 'Osteoporosis'/exp OR 'Osteoporosis':ab,ti OR 'Osteoporos'/exp OR 'Osteonpenia':ab,ti OR 'Bone loss'/exp OR 'bone losses'/exp                                                         |
| #3 | 'Biphosphonate':ab,ti OR 'diphosphonate':ab,ti OR 'alendronate'/exp OR 'risedronate':ab,ti OR 'ibandonate':ab,ti OR 'pamidronate':ab,ti OR 'pamidronate':ab,ti OR 'zoledronate':ab,ti |
| #4 | #1and #2 and #3                                                                                                                                                                       |

## 2. central

|    |                                                                                                                                                                                       |
|----|---------------------------------------------------------------------------------------------------------------------------------------------------------------------------------------|
| #1 | [mh "steroid"] OR 'steroid':ab,ti OR ' glucocorticoid':ab,ti OR [mh "glucocorticoid"]                                                                                                 |
| #2 | [mh "Osteoporosis"] OR 'Osteoporosis':ab,ti OR [mh "Osteoporos"] OR 'Osteonpenia':ab,ti OR [mh "Bone loss"] OR [mh "bone losses"]                                                     |
| #2 | 'Biphosphonate':ab,ti OR 'diphosphonate':ab,ti OR 'alendronate'/exp OR 'risedronate':ab,ti OR 'ibandonate':ab,ti OR 'pamidronate':ab,ti OR 'pamidronate':ab,ti OR 'zoledronate':ab,ti |
| #4 | #1and #2 and #3                                                                                                                                                                       |

**PRISMA-P (Preferred Reporting Items for Systematic review and Meta-Analysis Protocols) 2015 checklist: recommended items to address in a systematic review protocol\***

| Section and topic                 | Item No | Checklist item                                                                                                                                                                                                                |            |
|-----------------------------------|---------|-------------------------------------------------------------------------------------------------------------------------------------------------------------------------------------------------------------------------------|------------|
| <b>ADMINISTRATIVE INFORMATION</b> |         |                                                                                                                                                                                                                               |            |
| Title:                            |         |                                                                                                                                                                                                                               |            |
| Identification                    | 1a      | Identify the report as a protocol of a systematic review                                                                                                                                                                      | 1          |
| Update                            | 1b      | If the protocol is for an update of a previous systematic review, identify as such                                                                                                                                            | 1          |
| Registration                      | 2       | If registered, provide the name of the registry (such as PROSPERO) and registration number                                                                                                                                    | 1          |
| Authors:                          |         |                                                                                                                                                                                                                               |            |
| Contact                           | 3a      | Provide name, institutional affiliation, e-mail address of all protocol authors; provide physical mailing address of corresponding author                                                                                     | Title page |
| Contributions                     | 3b      | Describe contributions of protocol authors and identify the guarantor of the review                                                                                                                                           | 10         |
| Amendments                        | 4       | If the protocol represents an amendment of a previously completed or published protocol, identify as such and list changes; otherwise, state plan for documenting important protocol amendments                               | N/A        |
| Support:                          |         |                                                                                                                                                                                                                               |            |
| Sources                           | 5a      | Indicate sources of financial or other support for the review                                                                                                                                                                 | 10         |
| Sponsor                           | 5b      | Provide name for the review funder and/or sponsor                                                                                                                                                                             | 10         |
| Role of sponsor or funder         | 5c      | Describe roles of funder(s), sponsor(s), and/or institution(s), if any, in developing the protocol                                                                                                                            | 10         |
| <b>INTRODUCTION</b>               |         |                                                                                                                                                                                                                               |            |
| Rationale                         | 6       | Describe the rationale for the review in the context of what is already known                                                                                                                                                 | 2          |
| Objectives                        | 7       | Provide an explicit statement of the question(s) the review will address with reference to participants, interventions, comparators, and outcomes (PICO)                                                                      | 2          |
| <b>METHODS</b>                    |         |                                                                                                                                                                                                                               |            |
| Eligibility criteria              | 8       | Specify the study characteristics (such as PICO, study design, setting, time frame) and report characteristics (such as years considered, language, publication status) to be used as criteria for eligibility for the review | 5,6        |
| Information sources               | 9       | Describe all intended information sources (such as electronic databases, contact with study authors, trial registers or other grey literature sources) with planned dates of coverage                                         | 5,6        |
| Search strategy                   | 10      | Present draft of search strategy to be used for at least one electronic database, including planned limits, such that it could be repeated                                                                                    | Table 1    |

|                                    |     |                                                                                                                                                                                                                                                           |       |
|------------------------------------|-----|-----------------------------------------------------------------------------------------------------------------------------------------------------------------------------------------------------------------------------------------------------------|-------|
| Study records:                     |     |                                                                                                                                                                                                                                                           |       |
| Data management                    | 11a | Describe the mechanism(s) that will be used to manage records and data throughout the review                                                                                                                                                              | 6     |
| Selection process                  | 11b | State the process that will be used for selecting studies (such as two independent reviewers) through each phase of the review (that is, screening, eligibility and inclusion in meta-analysis)                                                           | 6     |
| Data collection process            | 11c | Describe planned method of extracting data from reports (such as piloting forms, done independently, in duplicate), any processes for obtaining and confirming data from investigators                                                                    | 6     |
| Data items                         | 12  | List and define all variables for which data will be sought (such as PICO items, funding sources), any pre-planned data assumptions and simplifications                                                                                                   | 5,6,7 |
| Outcomes and prioritization        | 13  | List and define all outcomes for which data will be sought, including prioritization of main and additional outcomes, with rationale                                                                                                                      | 7,8   |
| Risk of bias in individual studies | 14  | Describe anticipated methods for assessing risk of bias of individual studies, including whether this will be done at the outcome or study level, or both; state how this information will be used in data synthesis                                      | 8     |
| Data synthesis                     | 15a | Describe criteria under which study data will be quantitatively synthesised                                                                                                                                                                               | 8,9   |
|                                    | 15b | If data are appropriate for quantitative synthesis, describe planned summary measures, methods of handling data and methods of combining data from studies, including any planned exploration of consistency (such as I <sup>2</sup> , Kendall's $\tau$ ) | 8,9   |
|                                    | 15c | Describe any proposed additional analyses (such as sensitivity or subgroup analyses, meta-regression)                                                                                                                                                     | 8,9   |
|                                    | 15d | If quantitative synthesis is not appropriate, describe the type of summary planned                                                                                                                                                                        | 8,9   |
| Meta-bias(es)                      | 16  | Specify any planned assessment of meta-bias(es) (such as publication bias across studies, selective reporting within studies)                                                                                                                             | 9     |
| Confidence in cumulative evidence  | 17  | Describe how the strength of the body of evidence will be assessed (such as GRADE)                                                                                                                                                                        | N/A   |

**\* It is strongly recommended that this checklist be read in conjunction with the PRISMA-P Explanation and Elaboration (cite when available) for important clarification on the items. Amendments to a review protocol should be tracked and dated. The copyright for PRISMA-P (including checklist) is held by the PRISMA-P Group and is distributed under a Creative Commons Attribution Licence 4.0.**

*From: Shamseer L, Moher D, Clarke M, Ghersi D, Liberati A, Petticrew M, Shekelle P, Stewart L, PRISMA-P Group. Preferred reporting items for systematic review and meta-analysis protocols (PRISMA-P) 2015: elaboration and explanation. BMJ. 2015 Jan 2;349(jan02 1):g7647.*
