# Supplementary material for: Comparative effectiveness of bisphosphonate treatments for the prevention of re-fracture in glucocorticoid-induced osteoporosis: protocol for a systematic review and meta-analysis
Source: PubMed Central journal article supplement — BMJ Open. 2022 Sep 26;12(9):e062537. doi: 10.1136/bmjopen-2022-062537 (PMC9516213; doi:10.1136/bmjopen-2022-062537), 2022-09-26
Supplement: bmjopen-2022-062537supp001.pdf [file bmjopen-2022-062537supp001.pdf]

## Supplement 1. Searching strategies of EMBASE

## 1. embase

|    |                                                                                                                                                                                       |
|----|---------------------------------------------------------------------------------------------------------------------------------------------------------------------------------------|
| #1 | 'steroid'/exp OR 'steroid':ab,ti OR 'glucocorticoid'/exp OR 'glucocorticoid':ab,ti OR                                                                                                 |
| #2 | 'Osteoporosis'/exp OR 'Osteoporosis':ab,ti OR 'Osteoporos'/exp OR 'Osteonpenia':ab,ti OR 'Bone loss'/exp OR 'bone losses'/exp                                                         |
| #3 | 'Biphosphonate':ab,ti OR 'diphosphonate':ab,ti OR 'alendronate'/exp OR 'risedronate':ab,ti OR 'ibandonate':ab,ti OR 'pamidronate':ab,ti OR 'pamidronate':ab,ti OR 'zoledronate':ab,ti |
| #4 | #1 and #2 and #3                                                                                                                                                                      |

## 2. central

|    |                                                                                                                                                                                       |
|----|---------------------------------------------------------------------------------------------------------------------------------------------------------------------------------------|
| #1 | [mh "steroid"] OR 'steroid':ab,ti OR 'glucocorticoid':ab,ti OR [mh "glucocorticoid"]                                                                                                  |
| #2 | [mh "Osteoporosis"] OR 'Osteoporosis':ab,ti OR [mh "Osteoporos"] OR 'Osteonpenia':ab,ti OR [mh "Bone loss"] OR [mh "bone losses"]                                                     |
| #2 | 'Biphosphonate':ab,ti OR 'diphosphonate':ab,ti OR 'alendronate'/exp OR 'risedronate':ab,ti OR 'ibandonate':ab,ti OR 'pamidronate':ab,ti OR 'pamidronate':ab,ti OR 'zoledronate':ab,ti |
| #4 | #1 and #2 and #3                                                                                                                                                                      |
